# Supplementary material for: Pathology of Coronavirus Infections: A Review of Lesions in Animals in the One-Health Perspective
Source: MDPI journal article supplement (doi:10.3390/ani10122377), 2020-12-11
Supplement: s1 [file s1]

# Supplementary Materials: Pathology of Coronavirus Infections: A Review of Lesions in Animals in the One-Health Perspective

Valentina Zappulli <sup>1</sup>, Silvia Ferro <sup>1,\*</sup>, Federico Bonsembiante <sup>1,2</sup>, Ginevra Brocca <sup>1</sup>, Alessandro Calore <sup>1</sup>, Laura Cavicchioli <sup>1</sup>, Cinzia Centelleghes <sup>1</sup>, Giorgia Corazzola <sup>1</sup>, Steffen De Vreese <sup>1,3</sup>, Maria Elena Gelain <sup>1</sup>, Sandro Mazzariol <sup>1</sup>, Valentina Moccia <sup>1</sup>, Nicolò Rensi <sup>1</sup>, Alessandro Sammarco <sup>1,4</sup>, Filippo Torrigiani <sup>1</sup>, Ranieri Verin <sup>1</sup> and Massimo Castagnaro <sup>1</sup>

<sup>1</sup> Department of Comparative Biomedicine and Food Science, University of Padua, Legnaro, 35020 Padua, Italy; valentina.zappulli@unipd.it (V.Z.); federico.bonsembiante@unipd.it (F.B.); ginevra.brocca@phd.unipd.it (G.B.); alessandro.calore.1@studenti.unipd.it (A.C.); laura.cavicchioli@unipd.it (L.C.); cinzia.centelleghes@unipd.it (C.C.); giorgia.corazzola@gmail.com (G.C.); steffen.devreese@studenti.unipd.it (S.D.V.); mariaelena.gelain@unipd.it (M.E.G.); sandro.mazzariol@unipd.it (S.M.); valentina.moccia@phd.unipd.it (V.M.); nicolo.rensi@phd.unipd.it (N.R.); alessandro.sammarco@unipd.it (A.S.); filippo.torrigiani@unipd.it (F.T.); ranieri.verin@unipd.it (R.V.); massimo.castagnaro@unipd.it (M.C.)

<sup>2</sup> Department of Animal Medicine, Productions and Health, University of Padua, Legnaro, 35020 Padua, Italy

<sup>3</sup> Laboratory of Applied Bioacoustics, Technical University of Catalunya, BarcelonaTech, Vilanova i la Geltrú, 08800 Barcelona, Spain

<sup>4</sup> Department of Neurology and Radiology, Massachusetts General Hospital, Harvard Medical School, Boston, 02129 MA, USA

\* Correspondence: silvia.ferro@unipd.it

Received: 05 November 2020; Accepted: 09 December 2020; Published: 11 December 2020

**Table S1.** Coronavirus-associated diseases in animals and list of lesions in the main affected tissues. In black: Main lesions; in grey: Less frequently reported lesions. NR, not-reported; NHP, non-human primate.

| Host species | Name of disease/condition | Viral genus, subgenus | Virus strains/name               | Main extension of disease | Main involved tissues and associated lesions |                                                      |                                                                                              |                |                                                              |
|--------------|---------------------------|-----------------------|----------------------------------|---------------------------|----------------------------------------------|------------------------------------------------------|----------------------------------------------------------------------------------------------|----------------|--------------------------------------------------------------|
|              |                           |                       |                                  |                           | Upper respiratory tract                      | Lower respiratory tract                              | Alimentary system                                                                            | Nervous system | Hematopoietic and lymphatic systems/Urinary system           |
| Pets<br>Dog  |                           | Alphacoronavirus      | Canine Enteric CoV type I and II | Localized                 |                                              |                                                      | Mild enteritis with villous atrophy.<br>Attenuated low cuboidal to squamous epithelial cells |                | Lymphoid depletion of Peyer's patches                        |
|              |                           | Alphacoronavirus      | Canine Pantropic CoV type II-a   | Systemic                  |                                              | Fibrino-hemorrhagic and necrotizing bronchopneumonia | Hemorrhagic lymphoplasmacytic enteritis with fibrosis,                                       |                | Lymphoid depletion in spleen, thymus and lymph nodes and gut |

|               |                                     |                               |                                          |                |                                              | associated with perivascular and interstitial edema, vascular necrosis and emphysema                 | villus blunting, crypt ectasia or necrosis and submucosal and serosal edema<br>Ileocecal intussusception                        |                                                                                                                                                                                                                       | associated lymphoid tissue                                 |
|---------------|-------------------------------------|-------------------------------|------------------------------------------|----------------|----------------------------------------------|------------------------------------------------------------------------------------------------------|---------------------------------------------------------------------------------------------------------------------------------|-----------------------------------------------------------------------------------------------------------------------------------------------------------------------------------------------------------------------|------------------------------------------------------------|
|               |                                     | Betacoronavirus               | Canine Respiratory CoV (CRCoV)           | Localized      | Mild rhinitis with loss of mucosal cilia     | Mild tracheobronchitis and presence of peribronchiolar and perivascular lymphoid aggregates in lungs |                                                                                                                                 |                                                                                                                                                                                                                       |                                                            |
|               |                                     | Alphacoronavirus              | Feline enteric CoV type I and II (FECV)  | Localized      |                                              |                                                                                                      | Catarrhal and/or hemorrhagic enteritis with villous fusion and atrophy and sloughing of mucosal epithelium                      |                                                                                                                                                                                                                       | Lymphoid depletion of Peyer's patches                      |
| <b>Cat</b>    | Feline Infectious Peritonitis (FIP) | Alphacoronavirus              | Feline systemic CoV type I and II (FIPV) | Systemic       |                                              | Pleuritis and pyogranulomatous interstitial pneumonia. Pleural effusions. Granulomatous pleuritis    | Fibrinous and granulomatous peritonitis with serous protein-rich abdominal effusions. Pyogranulomatous enteritis and vasculitis | Ependymitis, periventriculitis meningoencephalitis with periarteritis, phlebitis, edema and periventricular reactive astrocytosis, and fibrin perivascular cuffs. Spongiosis and axonal spheroids in the white matter | Lymphoid depletion or focal pyogranulomatous lymphadenitis |
| <b>Rabbit</b> |                                     | Betacoronavirus               | Rabbit Enteric CoV (RECoV)               | Localized      |                                              |                                                                                                      | Mild necrotizing enteritis with villous blunting, crypts hypertrophy, vacuolation of enterocytes and mucosal edema              |                                                                                                                                                                                                                       |                                                            |
| <b>Ferret</b> | Epizootic catarrhal enteritis       | Alphacoronavirus, Minacovirus | Ferret enteric coronavirus (FRECV)       | Localized      |                                              |                                                                                                      | Necrotizing lymphocytic enteritis, with villus atrophy, fusion, and blunting                                                    |                                                                                                                                                                                                                       |                                                            |
| Host species  | Name of disease/conditio            | Viral genus, subgenus         | Virus strains/name                       | Main extension | Main involved tissues and associated lesions |                                                                                                      |                                                                                                                                 |                                                                                                                                                                                                                       |                                                            |
|               |                                     |                               |                                          |                | Upper                                        | Lower respiratory                                                                                    | Alimentary system                                                                                                               | Nervous system                                                                                                                                                                                                        | Hematopoietic and                                          |

|               | n             |                             | of disease                    | respiratory tract                   | tract     |                                                                                                                                                                                       | lymphatic systems/<br>Urinary system                                                                                                                                                                                  |                                                                                                                                                                                             |                                                                          |                                                                                    |
|---------------|---------------|-----------------------------|-------------------------------|-------------------------------------|-----------|---------------------------------------------------------------------------------------------------------------------------------------------------------------------------------------|-----------------------------------------------------------------------------------------------------------------------------------------------------------------------------------------------------------------------|---------------------------------------------------------------------------------------------------------------------------------------------------------------------------------------------|--------------------------------------------------------------------------|------------------------------------------------------------------------------------|
| <b>Pets</b>   | <b>Ferret</b> | Ferret systemic coronavirus | Alphacoronavirus, Minacovirus | Ferret systemic coronavirus (FRSCV) | Systemic  | Pyogranulomatous pneumonia                                                                                                                                                            | Pyogranulomatous enteritis (small intestine)                                                                                                                                                                          | Severe pyogranulomatous leptomeningitis, chorioiditis, ependymitis, and encephalomyelitis, centered on vessels                                                                              | Multifocal pyogranulomatous lymphadenitis                                |                                                                                    |
|               | <b>Bovine</b> |                             | Betacoronavirus               | Bovine coronavirus (BCoV)           | Systemic  | Degeneration and necrosis of epithelial cells in nasal turbinates and trachea. Segmental hyperplasia of the tracheal epithelium, with replacement by cuboidal to flattened epithelium | Thickening of the pulmonary interstitium, necrosis of epithelial cells in bronchioles and pulmonary parenchyma, bronchointerstitial pneumonia with syncytia, hyperplasia of type II pneumocytes. Neutrophilic exudate | Acute severe mucohemorrhagic colitis; mucosal ulceration; compensatory hyperplasia, hemorrhages, microabscesses, vasculitis. Mild atrophic enteritis of small intestine                     | Mesenteric lymph nodes depletion and necrosis, moderate BALT hyperplasia |                                                                                    |
|               | <b>Horse</b>  |                             | Betacoronavirus               | Equine coronavirus (ECoV)           | Systemic  |                                                                                                                                                                                       |                                                                                                                                                                                                                       | Necrotizing jejunitis and ileitis with pseudomembranes formation and crypt microabscesses, microthrombosis, crypt enterocytes intracytoplasmic inclusion bodies, hemorrhages. haemorrhages. | Cerebral cortex Alzheimer Type II astrocytosis                           | Lymphocytolysis of Peyer's patches. Widespread petechial hemorrhages in the thymus |
| <b>Equine</b> | <b>Donkey</b> |                             | Betacoronavirus               | Equine coronavirus (ECoV)           | Systemic  | Pulmonary congestion and edema                                                                                                                                                        |                                                                                                                                                                                                                       | Ulceration of oral mucosa and tongue                                                                                                                                                        |                                                                          | Lymphocytolysis of Peyer's patches                                                 |
|               | <b>Swine</b>  | Transmissible               | Alphacoronavirus              | Transmissible                       | Localized |                                                                                                                                                                                       |                                                                                                                                                                                                                       | Ascites, severe atrophic                                                                                                                                                                    |                                                                          |                                                                                    |

| Host species | Name of disease/condition       | Viral genus, subgenus                            | Virus strains/name                                   | Main extension of disease | Main involved tissues and associated lesions |                                                                                                  |                                                                                                                                                                                                  |                                                                |                                                                                                                                                                                              |
|--------------|---------------------------------|--------------------------------------------------|------------------------------------------------------|---------------------------|----------------------------------------------|--------------------------------------------------------------------------------------------------|--------------------------------------------------------------------------------------------------------------------------------------------------------------------------------------------------|----------------------------------------------------------------|----------------------------------------------------------------------------------------------------------------------------------------------------------------------------------------------|
|              |                                 |                                                  |                                                      |                           | Upper respiratory tract                      | Lower respiratory tract                                                                          | Alimentary system                                                                                                                                                                                | Nervous system                                                 | Hematopoietic and lymphatic systems/<br>Urinary system                                                                                                                                       |
| Swine        | Porcine Epidemic Diarrhea (PED) | Alphacoronavirus                                 | Porcine Epidemic Diarrhea virus (PEDV)               | Localized                 |                                              |                                                                                                  | Acute severe atrophic jejunitis, crypt hyperplasia, enterocytes syncytia and necrosis, attenuation and cytoplasmic vacuolation of superficial enterocytes.<br>Crypt epithelial cells hyperplasia |                                                                |                                                                                                                                                                                              |
|              |                                 | Deltacoronavirus                                 | Porcine Deltacoronavirus (PDCoV)                     | Localized                 |                                              | Mild multifocal bronchial-to-bronchiolar-centric areas of non-suppurative interstitial pneumonia | Acute severe atrophic jejunitis and ileitis, epithelial syncytia.<br>Villous atrophy, attenuation, blunting and fusion, vacuolated enterocytes in cecum and colon, crypts hyperplasia            |                                                                |                                                                                                                                                                                              |
|              |                                 | Alphacoronavirus                                 | Swine Acute Diarrhea Syndrome coronavirus (SADS-CoV) | Localized                 |                                              |                                                                                                  | Acute severe atrophic enteritis (small intestine)                                                                                                                                                |                                                                |                                                                                                                                                                                              |
|              |                                 | Porcine Hemagglutinating Encephalomyelitis (PHE) | Betacoronavirus                                      | PHE virus                 | Systemic                                     |                                                                                                  |                                                                                                                                                                                                  | Myenteric plexus degeneration (stomach-pyloric glandular area) | Replication and damage of sensory neurons (peripheral ganglia and CNS), perivascular cuffing around Meissner and Auerbach ganglia in the muscle layer of the stomach, ganglioneuritis in the |

| Host species   | Name of disease/condition | Viral genus, subgenus               | Virus strains/name                              | Main extension of disease | Main involved tissues and associated lesions |                                   |                                                                                         |                                                                                         |                                                                                                            |
|----------------|---------------------------|-------------------------------------|-------------------------------------------------|---------------------------|----------------------------------------------|-----------------------------------|-----------------------------------------------------------------------------------------|-----------------------------------------------------------------------------------------|------------------------------------------------------------------------------------------------------------|
|                |                           |                                     |                                                 |                           | Upper respiratory tract                      | Lower respiratory tract           | Alimentary system                                                                       | Nervous system                                                                          | Hematopoietic and lymphatic systems/Urinary system                                                         |
|                |                           | Alphacoronavirus                    | Porcine Respiratory Coronavirus (PRCV)          | Localized                 |                                              | Interstitial pneumonia            |                                                                                         |                                                                                         | trigeminal ganglion, non-suppurative encephalomyelitis. Satellitosis and gliosis in brainstem (in piglets) |
| Wild felids    | Cheetah                   | Feline Infectious Peritonitis (FIP) | Feline coronavirus                              | Systemic                  |                                              |                                   | Gastric ulcers, erosive/necrotizing enteritis                                           |                                                                                         | Multifocal necrosis of spleen, thymus and lymph nodes                                                      |
|                | Mountain lion             | Feline Infectious Peritonitis (FIP) | Feline coronavirus                              | Systemic                  |                                              |                                   | Muscular necrosis and vasculitis in the intestine                                       | Vacuolation of the neuropil with occasional axonal swelling of the posterior colliculus |                                                                                                            |
|                | African lion              | Feline Infectious Peritonitis (FIP) | Feline coronavirus                              | Systemic                  |                                              |                                   |                                                                                         | Dilated perivascular spaces mainly in the white matter                                  |                                                                                                            |
|                | Wildcat                   |                                     | Feline coronavirus                              | Systemic                  |                                              | Patchy consolidation of the lungs | Thickening of the serosa surface of the intestine by fibrin and leucocytic inflammation | Vascular lesions in the meninges                                                        |                                                                                                            |
| Wild ruminants | Several species of deer   |                                     | BCoV-like coronavirus                           | Localized                 |                                              |                                   | Gastroenteritis                                                                         |                                                                                         |                                                                                                            |
|                | Waterbuck antelope        | Winter dysentery                    | CoV's antigenically indistinguishable from BCoV | Localized                 |                                              |                                   | Gastroenteritis                                                                         |                                                                                         |                                                                                                            |
|                | Giraffe                   |                                     | BCoV-like coronavirus                           | Localized                 |                                              |                                   | Gastroenteritis                                                                         |                                                                                         |                                                                                                            |
|                | Llama                     |                                     | Betacoronavirus, Embecovirus                    | Localized                 |                                              |                                   | Gastroenteritis                                                                         |                                                                                         |                                                                                                            |

| Alpaca             |                                                     | Betacoronavirus, Embecovirus    | Alpaca (beta) coronavirus (ACoV)                          | Systemic                  |                                              | Respiratory disease, undescribed lesions       | Gastroenteritis                                                                 |                |                                                     |
|--------------------|-----------------------------------------------------|---------------------------------|-----------------------------------------------------------|---------------------------|----------------------------------------------|------------------------------------------------|---------------------------------------------------------------------------------|----------------|-----------------------------------------------------|
|                    |                                                     | Alphacoronavirus, Duvinacovirus | Alpaca (alpha) coronavirus (ACoV)                         | Localized                 |                                              | Respiratory disease, undescribed lesions       |                                                                                 |                |                                                     |
| Dromedary camel    |                                                     | Betacoronavirus, Embecovirus    | Dromedary camel coronavirus UAE- HKU-23 (DcCoV UAE-HKU23) | Localized                 |                                              |                                                | Gastroenteritis                                                                 |                |                                                     |
|                    |                                                     | Betacoronavirus, Merbecovirus   | MERS-related CoV                                          | Localized                 | Mild upper respiratory tract infection       |                                                |                                                                                 |                |                                                     |
| Host species       | Name of disease/condition                           | Viral genus, subgenus           | Virus strains/name                                        | Main extension of disease | Main involved tissues and associated lesions |                                                |                                                                                 |                |                                                     |
|                    |                                                     |                                 |                                                           |                           | Upper respiratory tract                      | Lower respiratory tract                        | Alimentary system                                                               | Nervous system | Hematopoietic and lymphatic systems/ Urinary system |
| Wild ruminants     | Water buffalo                                       | Betacoronavirus, Embecovirus    | Bubaline coronavirus (BuCoV)                              | Localized                 |                                              |                                                | Severe gastroenteritis, with congestion and hemorrhages                         |                | Enlargement of the mesenteric lymph nodes           |
|                    | Elk (wapiti)                                        |                                 | BCoV-like coronavirus                                     | Systemic                  |                                              | Interstitial pneumonia with syncytia formation | Enteritis with syncytia formation                                               |                |                                                     |
|                    | Musk oxen, Sitatunga, Wisent, Himalayan tahr, Nyala | Winter dysentery                |                                                           | BCoV-like coronavirus     | Localized                                    |                                                | Severe bloody diarrhea                                                          |                |                                                     |
| Other wild animals | American and European mink                          | Alphacoronavirus, Minacovirus   | Mink                                                      | Mink coronavirus 1        | Localized                                    |                                                | Severe acute catarrhal gastroenteritis                                          |                |                                                     |
|                    |                                                     |                                 |                                                           | SARS-CoV-2                | Localized                                    |                                                | Diffuse interstitial pneumonia with hyperemia, alveolar damage, and atelectasis |                |                                                     |

|                           |                                  |                                  |                                   |                                                                  |                                  |                                                     |                                |                          |                                                                                                   |                                                            |
|---------------------------|----------------------------------|----------------------------------|-----------------------------------|------------------------------------------------------------------|----------------------------------|-----------------------------------------------------|--------------------------------|--------------------------|---------------------------------------------------------------------------------------------------|------------------------------------------------------------|
|                           | <b>European and Italian wolf</b> |                                  | Canine enteric coronaviruses      | Localized                                                        |                                  |                                                     |                                |                          | No lesions described                                                                              |                                                            |
|                           | <b>Red fox</b>                   |                                  | SARS-like CoV                     | Systemic                                                         |                                  |                                                     |                                |                          | No lesions described                                                                              |                                                            |
|                           |                                  |                                  | Canine CoV                        | Localized                                                        |                                  |                                                     |                                |                          | Mild, self-limiting enteritis                                                                     |                                                            |
|                           | <b>Raccoon</b>                   | Alphacoronavirus-1               | SARS-like CoV                     | Systemic                                                         |                                  | Mild bronchopneumonia                               |                                |                          | Fibrinous gastroenteritis of small intestine, and diffuse blunting and fusion of intestinal villi |                                                            |
|                           | <b>Eurasian otter</b>            |                                  | Canine CoV                        | Localized                                                        |                                  |                                                     |                                |                          | Mild, self-limiting enteritis                                                                     |                                                            |
|                           | <b>Common genet</b>              |                                  | Canine CoV                        | Localized                                                        |                                  |                                                     |                                |                          | Mild, self-limiting enteritis                                                                     |                                                            |
|                           | <b>Masked palm civet</b>         |                                  | SARS-like CoV                     | NR                                                               |                                  |                                                     |                                |                          | No lesions described                                                                              |                                                            |
|                           | <b>Spotted hyena</b>             | Alphacoronavirus                 | Feline CoV type II and Canine CoV | NR                                                               |                                  |                                                     |                                |                          | No lesions described                                                                              |                                                            |
|                           | <b>Silver-backed jackal</b>      | Alphacoronavirus                 |                                   | NR                                                               |                                  |                                                     |                                |                          | No lesions described                                                                              |                                                            |
|                           | <b>Host species</b>              | <b>Name of disease/condition</b> | <b>Viral genus, subgenus</b>      | <b>Virus strains/name</b>                                        | <b>Main extension of disease</b> | <b>Main involved tissues and associated lesions</b> |                                |                          |                                                                                                   |                                                            |
|                           |                                  |                                  |                                   |                                                                  |                                  | <b>Upper respiratory tract</b>                      | <b>Lower respiratory tract</b> | <b>Alimentary system</b> | <b>Nervous system</b>                                                                             | <b>Hematopoietic and lymphatic systems/ Urinary system</b> |
| <b>Other wild animals</b> | <b>European hedgehog</b>         |                                  |                                   | Hedgehog coronavirus 1 (Erinaceus CoV, EriCoV)                   | NR                               |                                                     |                                |                          |                                                                                                   | No lesions described                                       |
|                           | <b>Amur hedgehog</b>             |                                  |                                   | Erinaceus amurensis hedgehog coronavirus HKU31 (Ea-HedCoV HKU31) | NR                               |                                                     |                                |                          |                                                                                                   | No lesions described                                       |
|                           | <b>Asian house shrew</b>         | Alphacoronavirus                 |                                   | Wénchéng shrew coronavirus (WESV)                                | NR                               |                                                     |                                |                          |                                                                                                   | No lesions described                                       |

|                                                     |                     |                                  |                              |                                          |                                      |                                          |                                                                              |                                                                                         |                                                                                                           |                                                           |
|-----------------------------------------------------|---------------------|----------------------------------|------------------------------|------------------------------------------|--------------------------------------|------------------------------------------|------------------------------------------------------------------------------|-----------------------------------------------------------------------------------------|-----------------------------------------------------------------------------------------------------------|-----------------------------------------------------------|
| NHP                                                 | Chimpanzee (wild)   |                                  | Betacoronavirus 1            | Human coronavirus (HCoV) OC43            | Localized                            | Respiratory disease, undescribed lesions |                                                                              |                                                                                         |                                                                                                           |                                                           |
|                                                     | Marine mammals      | Beluga whale                     |                              | Beluga whale coronavirus SW1 (BWCoV-SW1) | Localized                            | Respiratory disease, undescribed lesions |                                                                              |                                                                                         |                                                                                                           |                                                           |
|                                                     |                     | Indo-Pacific bottlenose dolphin  |                              |                                          | Bottlenose dolphin CoV (BdCoV) HKU22 | NR                                       | No lesions described                                                         |                                                                                         |                                                                                                           |                                                           |
| Lab animals                                         | Mouse               |                                  | Betacoronavirus, Embecovirus | Mouse hepatitis virus (MHV) polytropic   | Systemic                             | Necrosis of olfactory epithelium         | Interstitial pneumonia                                                       | Nasoencephalitis, necrotizing meningoencephalitis, demyelination, axonal loss, syncytia | Necrosis of spleen, lymph nodes, thymus, GALT, bone marrow; syncytia of parenchymal and endothelial cells |                                                           |
|                                                     |                     |                                  |                              | Mouse hepatitis virus (MHV) enterotropic | Systemic                             |                                          |                                                                              | Encephalitis                                                                            | Lymphocytic syncytia in mesenteric lymph nodes                                                            |                                                           |
|                                                     | Rat                 |                                  | Betacoronavirus, Embecovirus | Sialodacryoadenitis virus (SDAV)         | Systemic                             | Necrotizing rhinitis, laryngitis         | Necrotizing tracheitis, bronchitis and bronchiolitis, interstitial pneumonia | Necrotizing sialoadenitis                                                               | Necrotizing encephalitis                                                                                  |                                                           |
| <b>Main involved tissues and associated lesions</b> |                     |                                  |                              |                                          |                                      |                                          |                                                                              |                                                                                         |                                                                                                           |                                                           |
|                                                     | <b>Host species</b> | <b>Name of disease/condition</b> | <b>Viral genus, subgenus</b> | <b>Virus strains/name</b>                | <b>Main extension of disease</b>     | <b>Upper respiratory tract</b>           | <b>Lower respiratory tract</b>                                               | <b>Alimentary system</b>                                                                | <b>Nervous system</b>                                                                                     | <b>Hematopoietic and lymphatic systems/Urinary system</b> |
| Lab animals                                         | Rat                 |                                  |                              | Parker's rat coronavirus (PRC)           | Systemic                             |                                          | Necrotizing tracheitis, interstitial pneumonia                               |                                                                                         |                                                                                                           |                                                           |
|                                                     | Guinea pigs         | Coronavirus-like syndrome        | Unknown                      |                                          | Localized                            |                                          |                                                                              | Necrotizing enteritis, blunting and fusion of villi, syncytia of enterocytes            |                                                                                                           |                                                           |
| Fish                                                | White bream         |                                  | Bafinivirus                  | White bream virus                        | Systemic                             |                                          | Gills hemorrhages                                                            |                                                                                         |                                                                                                           | Congestion and hemorrhages                                |



|               |                             |                                                                                                       |                              |                                                |                           |                                              |                                                                                                |                                                                                       |                                                                                                                                                                                         |                                                    |
|---------------|-----------------------------|-------------------------------------------------------------------------------------------------------|------------------------------|------------------------------------------------|---------------------------|----------------------------------------------|------------------------------------------------------------------------------------------------|---------------------------------------------------------------------------------------|-----------------------------------------------------------------------------------------------------------------------------------------------------------------------------------------|----------------------------------------------------|
| Reptiles      | Cyprinids                   |                                                                                                       | Bafinivirus                  |                                                | Systemic                  |                                              | Gills hemorrhages                                                                              |                                                                                       |                                                                                                                                                                                         |                                                    |
|               | Nile crocodiles             |                                                                                                       | Unknown                      |                                                | NR                        |                                              |                                                                                                |                                                                                       | No lesions described                                                                                                                                                                    |                                                    |
| Avian species | Chicken                     | Infectious bronchitis                                                                                 | Gammacoronavirus, Igacovirus | Infectious bronchitis virus (mainly M41) (IBV) | Localized                 | Catarrhal rhinitis, laryngitis               | Catarrhal tracheitis and bronchitis, catarrhal pneumonia, catarrhal or fibrinous airsacculitis | Perivascular lymphocytic cuffing, degenerated neurons, satellitosis and neuronophagia | Interstitial lymphocytic and heterophilic nephritis, hemorrhages, tubular degeneration and necrosis, edema of Bowman's capsule, and dilated renal tubules with urate crystals and casts |                                                    |
|               | Pheasant                    | Pheasant corona-virus-associated nephritis or Pheasant coronavirus nephritis or Pheasant urolithiasis | Gammacoronavirus, Igacovirus | Pheasant CoV (IBV-like)                        | Localized                 |                                              | Tracheitis                                                                                     |                                                                                       | Interstitial nephritis                                                                                                                                                                  |                                                    |
|               | Pigeon                      |                                                                                                       | Gammacoronavirus, Igacovirus | Pigeon CoV                                     | Systemic                  |                                              | Lung lesions                                                                                   | Pancreatitis                                                                          |                                                                                                                                                                                         |                                                    |
|               | Turkey                      |                                                                                                       | Gammacoronavirus             | Turkey CoV                                     | Localized                 |                                              |                                                                                                | Severe enteritis                                                                      |                                                                                                                                                                                         |                                                    |
|               | Guinea fowl                 |                                                                                                       | Gmmacoronavirus              | Guinea fowl CoV                                | Localized                 |                                              |                                                                                                | Severe enteritis                                                                      |                                                                                                                                                                                         |                                                    |
|               | Quail                       |                                                                                                       | Gammacoronavirus             | Quail CoV (IBV-like)                           | Localized                 | Laryngitis                                   | Bronchitis and pneumonia                                                                       |                                                                                       | Renal disease, undescribed lesions                                                                                                                                                      |                                                    |
|               | Green-cheeked amazon parrot |                                                                                                       | Gammacoronavirus             |                                                | Localized                 |                                              |                                                                                                | Dilation of proventricolus                                                            |                                                                                                                                                                                         |                                                    |
|               | Host species                | Name of disease/condition                                                                             | Viral genus, subgenus        | Virus strains/name                             | Main extension of disease | Main involved tissues and associated lesions |                                                                                                |                                                                                       |                                                                                                                                                                                         |                                                    |
|               |                             |                                                                                                       |                              |                                                |                           | Upper respiratory tract                      | Lower respiratory tract                                                                        | Alimentary system                                                                     | Nervous system                                                                                                                                                                          | Hematopoietic and lymphatic systems/Urinary system |
| Avian species | Greylag geese               |                                                                                                       | Gammacoronavirus             |                                                | NR                        |                                              |                                                                                                |                                                                                       | No lesions described                                                                                                                                                                    |                                                    |
|               | Mallard duck                |                                                                                                       | Gammacoronavirus             |                                                | NR                        |                                              |                                                                                                |                                                                                       | No lesions described                                                                                                                                                                    |                                                    |
